# Supplementary material for: Reduced fibrous capsule formation at nano-engineered silicone surfaces via tantalum ion implantation
Source: Royal Society of Chemistry journal article supplement (doi:10.1039/c9bm00427k), 2019-01-01
Supplement: c9bm00427k1.pdf [file c9bm00427k1.pdf]

## Electronic Supplementary Information (EIS)

### Reduced fibrous capsule formation at nano-engineered silicone surfaces via tantalum ion implantation

Cheonil Park<sup>a,†</sup>, Si-Woo Lee<sup>b,†</sup>, Jinyoung Kim<sup>a</sup>, Eun-Ho Song<sup>a</sup>, Hyun-Do Jung<sup>c</sup>, Ji-Ung Park<sup>d</sup>

Hyoun-Ee Kim<sup>a</sup>, Sukwha Kim<sup>b,\*</sup>, and Tae-Sik Jang<sup>c,\*</sup>

<sup>a</sup> Department of Materials Science and Engineering, Seoul National University, Seoul, 08826, Korea

<sup>b</sup> Department of Plastic and Reconstructive Surgery, Seoul National University College of Medicine, Seoul, 03080, Korea

<sup>c</sup> Research Institute of Advanced Manufacturing Technology, Korea Institute of Industrial Technology, Incheon, 21999, Korea

<sup>d</sup> Department of Plastic and Reconstructive Surgery, Seoul National University Boramae Medical Center, Seoul, 07061, Korea

<sup>†</sup>Both authors contributed equally to this work

Co-Corresponding author.

E-mail address: [cgamja@snu.ac.kr](mailto:cgamja@snu.ac.kr) (T.S. Jang) / [kimsw@snu.ac.kr](mailto:kimsw@snu.ac.kr) (S. Kim)

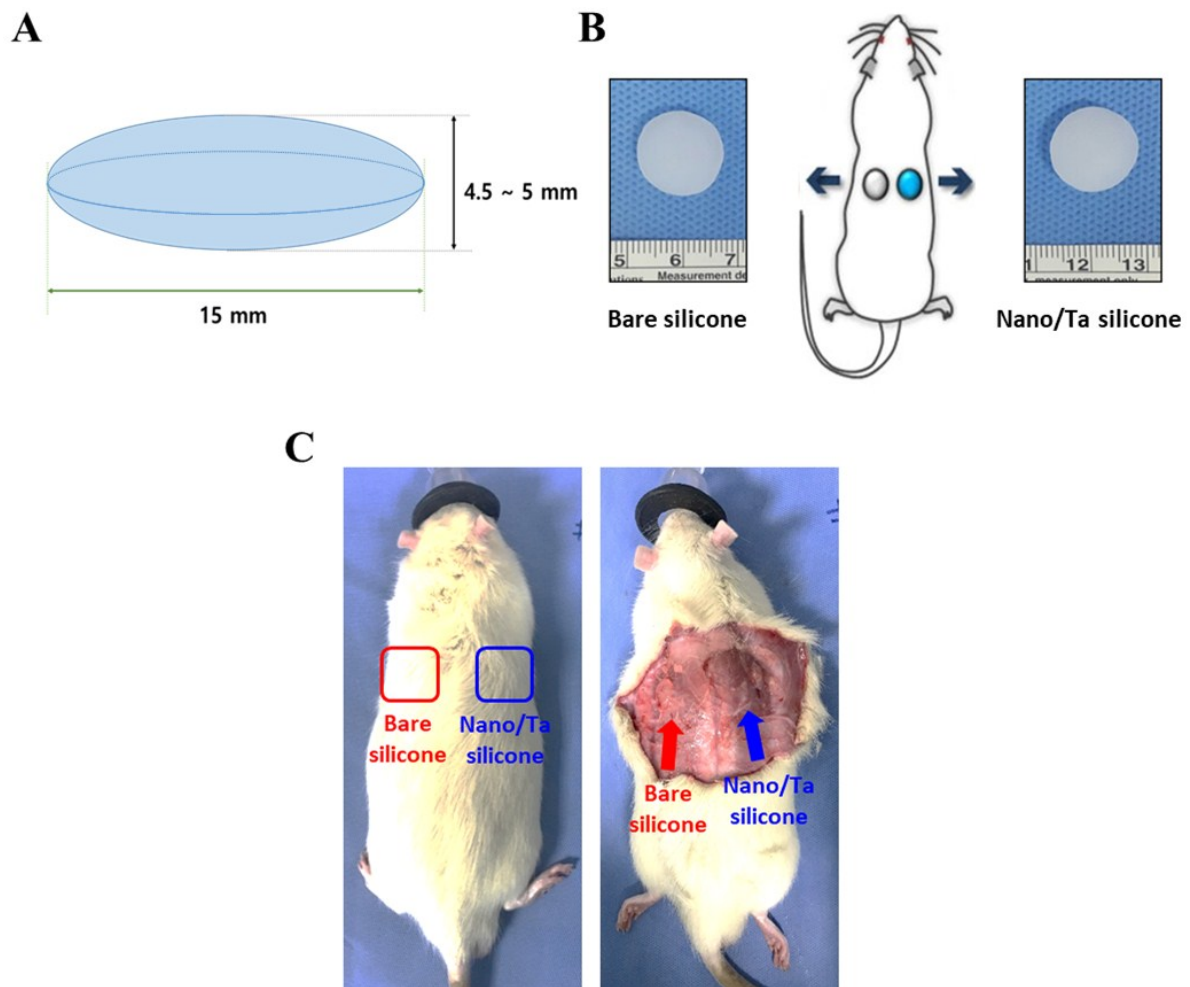

**Fig. S1.** (A) Schematic illustration of the silicone implant and its dimensions used in the *in vivo* animal test. (B) *In vivo* mouse dorsal implantation model. (C) Optical views of the implanted bare and Nano/Ta silicone samples after 8 weeks of surgery.

**Table S1a.** Mean- and maximum-height surface roughnesses ( $R_a$  and  $R_z$ ) for the three types of silicone implants.

| Surface roughness | Bare silicone | Smooth/Ta silicone | Nano/Ta silicone |
|-------------------|---------------|--------------------|------------------|
| $R_a$ (nm)        | $17 \pm 4$    | $21 \pm 7$         | $67 \pm 6$       |
| $R_z$ (nm)        | $87 \pm 16$   | $91 \pm 23$        | $368 \pm 34$     |

**Table S1b.** Mean- and maximum-height surface roughnesses ( $R_a$  and  $R_z$ ) of Smooth/Ta and Nano/Ta silicone after 28 days of immersion in PBS.

| Surface roughness | Smooth/Ta silicone | Nano/Ta silicone |
|-------------------|--------------------|------------------|
| $R_a$ (nm)        | $25 \pm 8$         | $65 \pm 7$       |
| $R_z$ (nm)        | $144 \pm 5$        | $404 \pm 35$     |

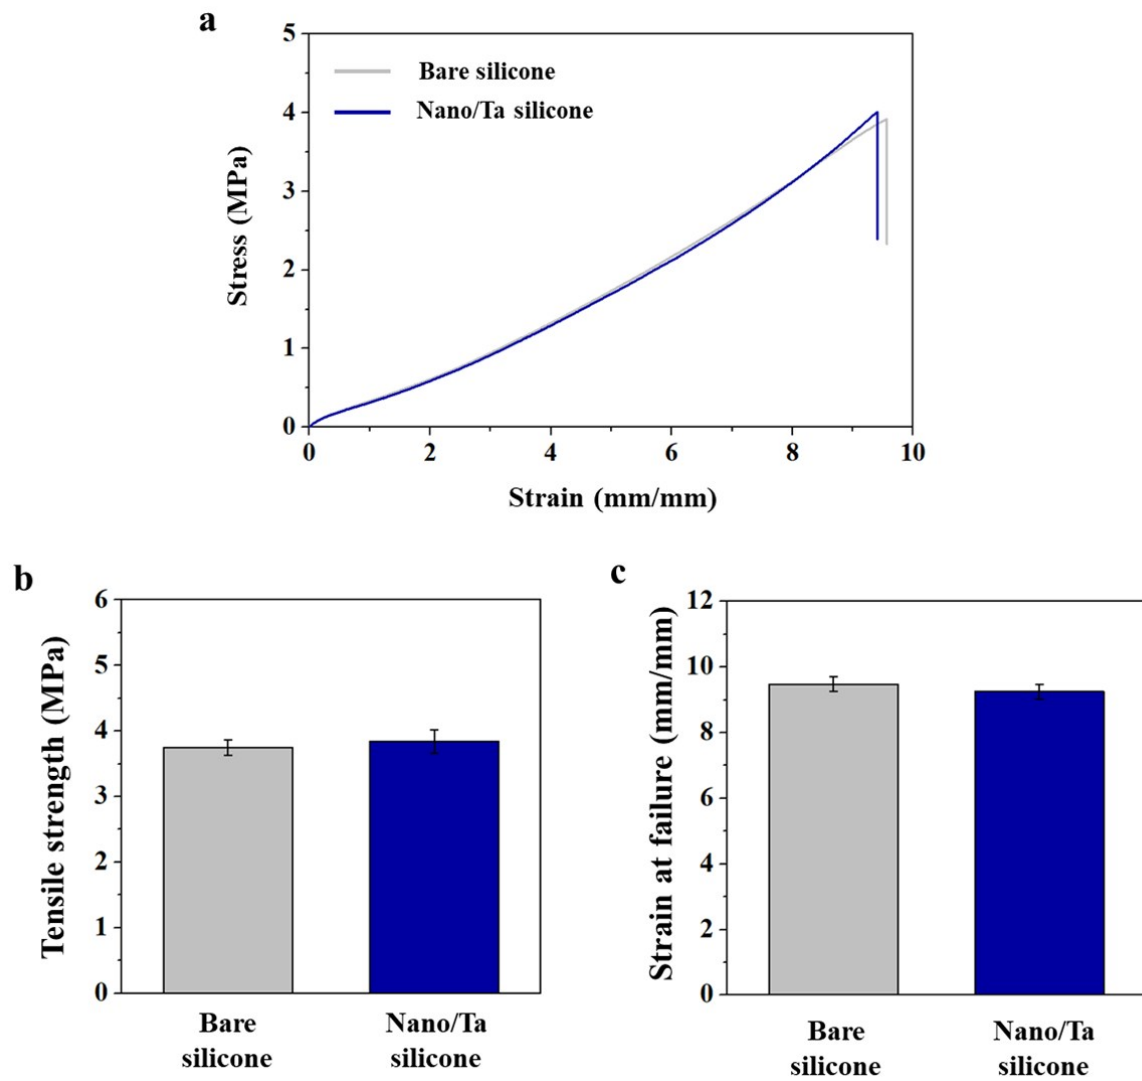

**Fig. S2.** (a) Stress–strain curve, (b) tensile strength, and (c) strain at failure of bare and Nano/Ta silicone implants.

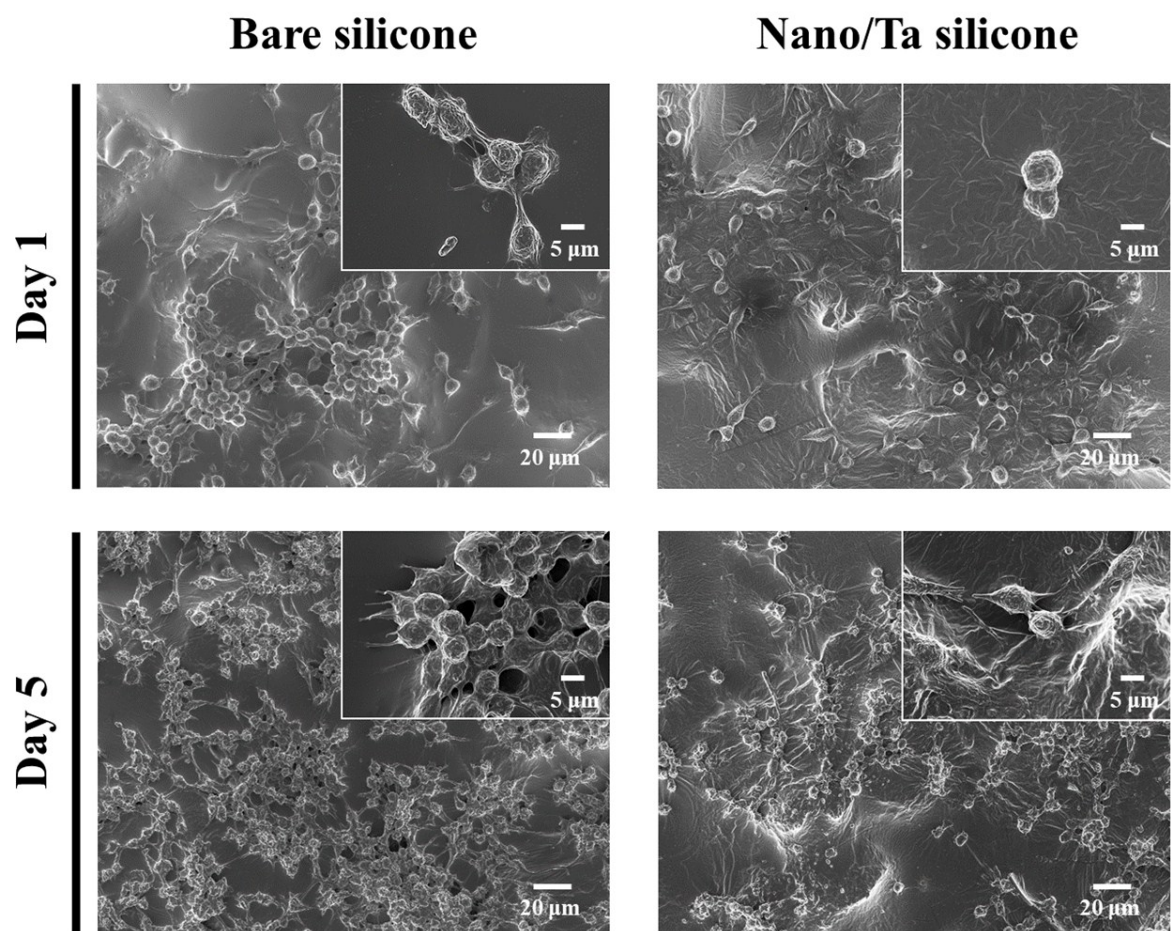

**Fig. S3.** FE-SEM images of adhered macrophages on the surfaces of bare and Nano/Ta silicone implants after 1 and 5 days of culturing. Insets are magnified views of the macrophages.
